# Supplementary material for: Preparation and evaluation of modified cyanobacteria-derived activated carbon for H2 adsorption
Source: Royal Society of Chemistry journal article supplement (doi:10.1039/c6ra28660g), 2017-01-01
Supplement: c6ra28660g1.pdf [file c6ra28660g1.pdf]

## Supporting Information

*for*

### **Preparation and evaluation of modified cyanobacteria-derived activated carbon for H<sub>2</sub> adsorption**

Jun Gao,<sup>a</sup> Jing Xie,<sup>b</sup> Xueyan Liu<sup>a</sup> and Hui Hu<sup>a</sup>

*<sup>a</sup>School of Environmental Sciences & Engineering, Huazhong University of Science and Technology, Wuhan 430074, China. E-mail: huhust@163.com; Fax: +86 2787792141; Tel: +86 2787792141*

*<sup>b</sup>Faculty of Materials Science and Chemistry, China University of Geosciences, Wuhan 430074, China*

**Table S1 Component analyses of CB ash by XRF experiments**

| <b>component</b>               | <b>CB ash (Wt.%)</b> |
|--------------------------------|----------------------|
| SiO <sub>2</sub>               | 10.56                |
| Al <sub>2</sub> O <sub>3</sub> | 25.84                |
| Fe <sub>2</sub> O <sub>3</sub> | 2.44                 |
| MgO                            | 4.76                 |
| CaO                            | 18.87                |
| K <sub>2</sub> O               | 7.98                 |
| P <sub>2</sub> O <sub>5</sub>  | 20.03                |
| SO <sub>3</sub>                | 9.17                 |
| TiO <sub>2</sub>               | 0.33                 |
| MnO                            | 0.08                 |

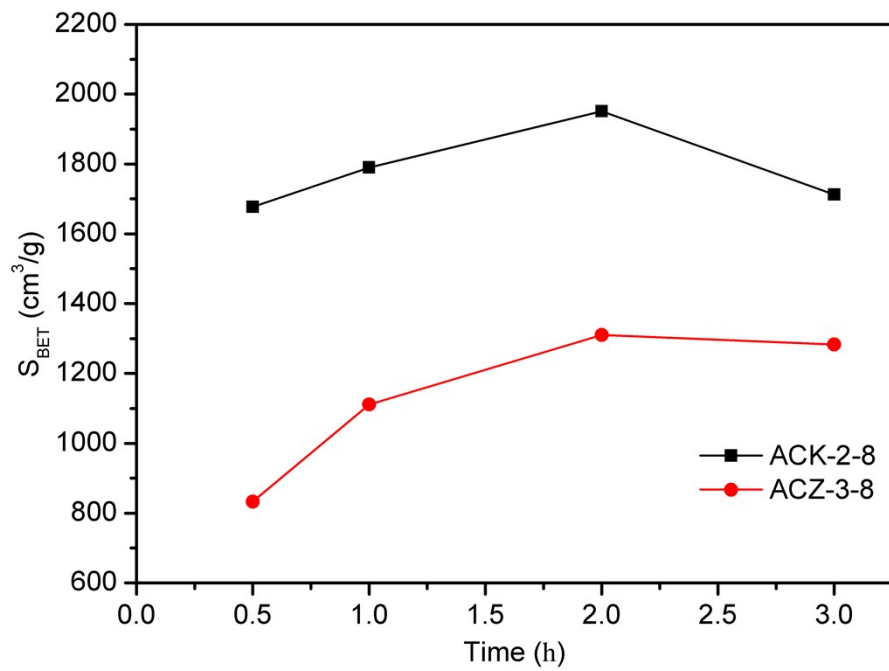

**Fig. S1** Effect of activation time on  $\text{N}_2$  adsorption-desorption experiment on ACK-2-8 and  
ACZ-3-8

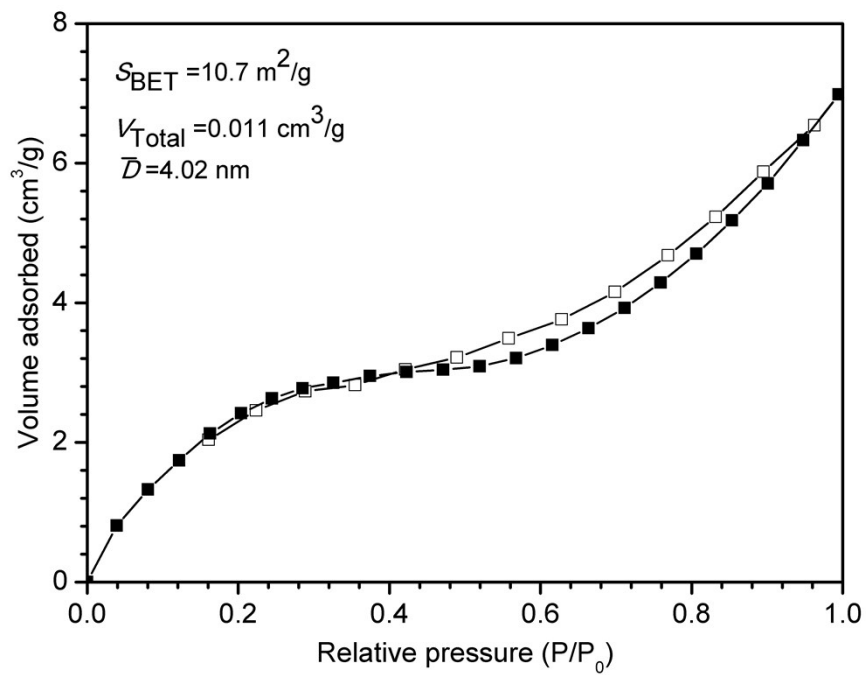

**Fig. S2 Nitrogen adsorption (solid) /desorption (open) isotherm and Porous properties for pretreated carbonized material AC**

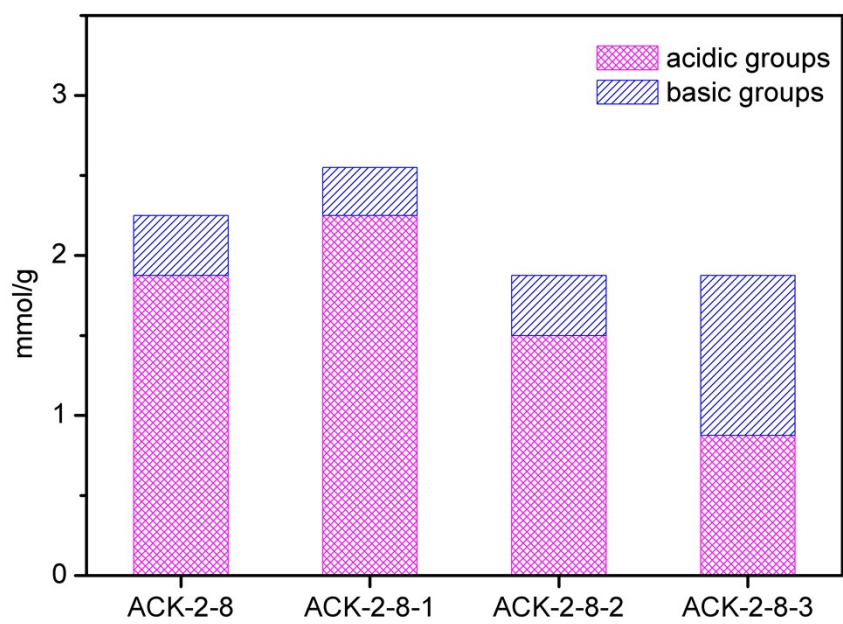

**Fig. S3 Comparison of surface acidic-basic functional groups on different activated carbons**

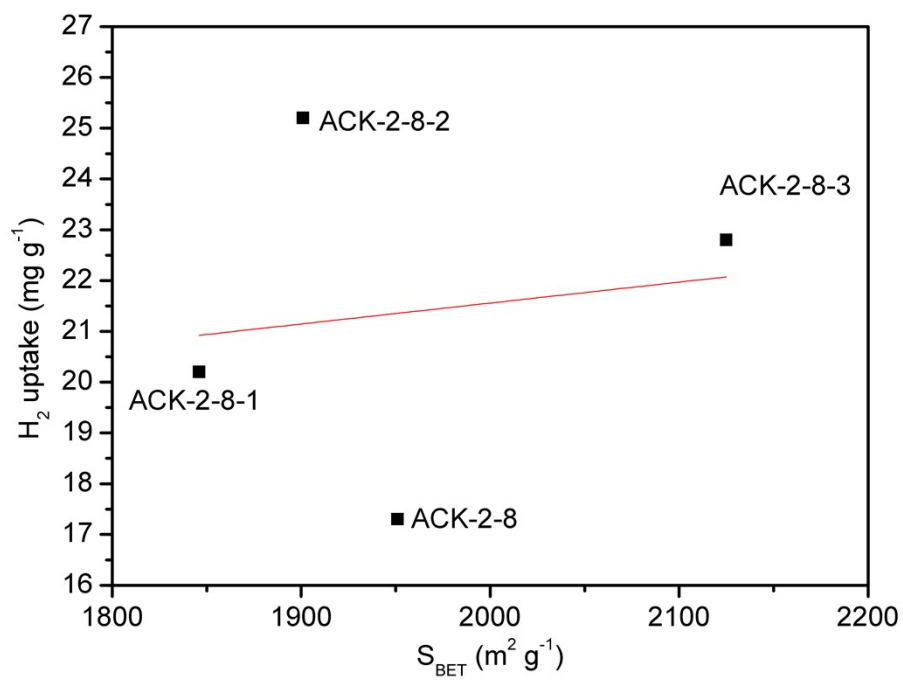

**Fig. S4** The relationship between the  $\text{H}_2$  adsorption amount (at  $-196^\circ\text{C}$  and 1 bar) and BET surface area on some samples
